# Supplementary material for: Acid–base reaction-based dispersive solid phase extraction of favipiravir using biotin from biological samples prior to capillary electrophoresis analysis
Source: Royal Society of Chemistry journal article supplement (doi:10.1039/d3ra07356d), 2024-01-01
Supplement: d3ra07356d1.pdf [file d3ra07356d1.pdf]

### Supplementary data

#### **Acid-base reaction-based dispersive solid phase extraction of favipiravir using biotin from biological samples prior to capillary electrophoresis analysis**

Elnaz Safari<sup>a</sup>, Behrouz Seyfinejad<sup>b,c</sup>, Mir Ali Farajzadeh<sup>d,e</sup>, Mohammad Reza Afshar Mogaddam<sup>c,\*</sup>  
Mahboob Nemati<sup>a,c\*</sup>

<sup>a</sup> *Pharmaceutical and Food Control Department, Faculty of Pharmacy, Tabriz University of Medical Sciences, Tabriz, Iran*

<sup>b</sup> *Pharmaceutical Analysis Research Center, Tabriz University of Medical Sciences, Tabriz, Iran*

<sup>c</sup> *Food and Drug Safety Research Center, Tabriz University of Medical Sciences, Tabriz, Iran*

<sup>d</sup> *Department of Analytical Chemistry, Faculty of Chemistry, University of Tabriz, Tabriz, Iran*

<sup>e</sup> *Engineering Faculty, Near East University, 99138 Nicosia, North Cyprus, Mersin 10, Turkey*

\*Corresponding author: Prof. M. Nemati

Email address: nematim@tbzmed.ac.ir; mahnema@gmail.com

\*Corresponding author: Dr. M. R. Afshar Mogaddam

Email address: mr.afsharmogaddam@yahoo.com; Afsharmogaddam@tbzmed.ac.ir

Tel.: +98 4133372250

Fax: 98 4133344798

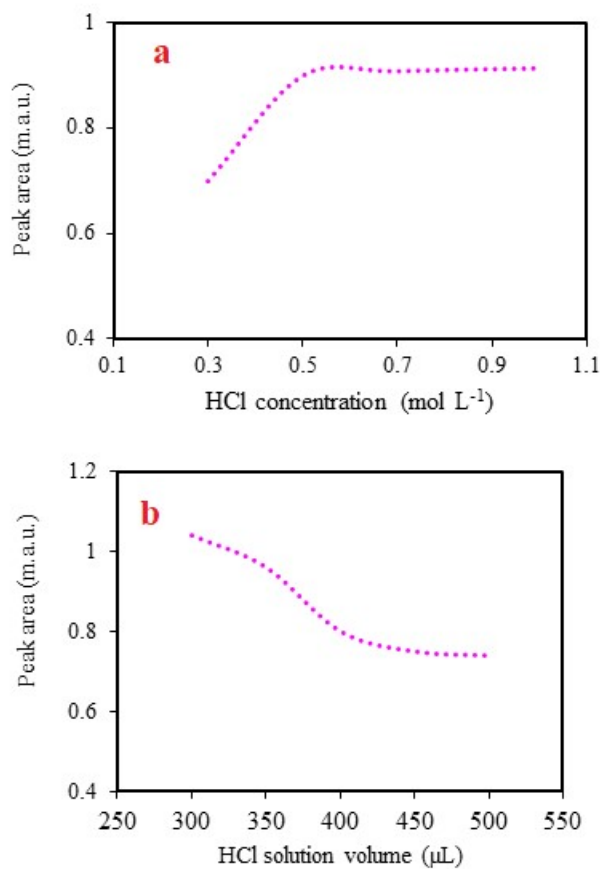

Fig. S1. The effect of HCl solution concentration (a) and volume (b) on extraction efficiency.

(a) Extraction conditions: sample, 5 mL deionized water spiked with favipiravir at 250 ng mL<sup>-1</sup>; adsorbent (amount), biotin (25 mg); acid solution volume, 300 μL; agitation type (time), vortex (1 min); elution solvent (volume), ACN (200 μL); desorption time, 2 min; and centrifugation rate (time), 4000 rpm, 5 min.

(b) Extraction conditions: are the same as those used in Fig. S1a, except the HCl solution concentration was 0.5 mol L<sup>-1</sup>.

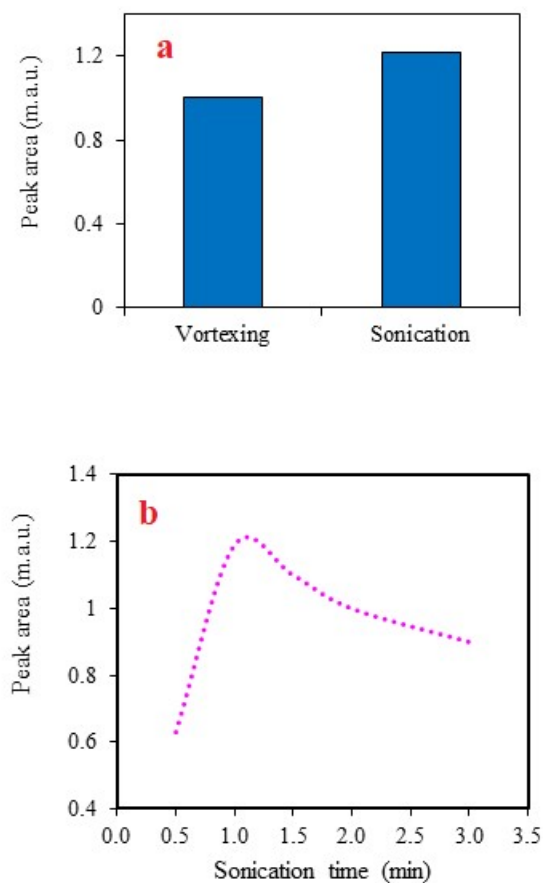

Fig. S2. The effect of agitation type (a) and time (b) on extraction efficiency.

(a) Extraction conditions: are the same as those used in Fig. S1b, except 300  $\mu\text{L}$  of HCl solution (0.5 mol  $\text{L}^{-1}$ ) was used.

(b) Extraction conditions: are the same as those used in Fig. S2a, except sonication was selected as the agitation type.

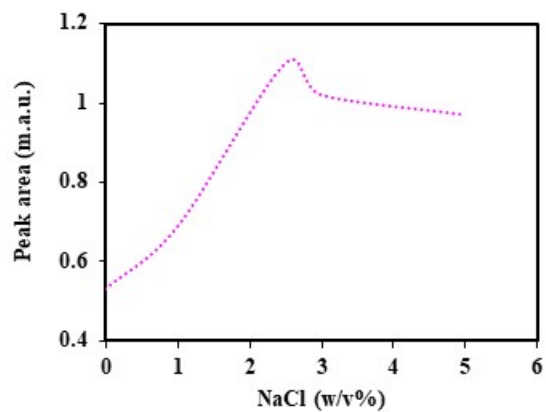

Fig. S3. The effect of salt addition on extraction efficiency.

Extraction conditions: are the same as those used in Fig. 4b, except 100  $\mu$ L of ACN and 1 min were chosen as the eluent and adsorption time, repetively.

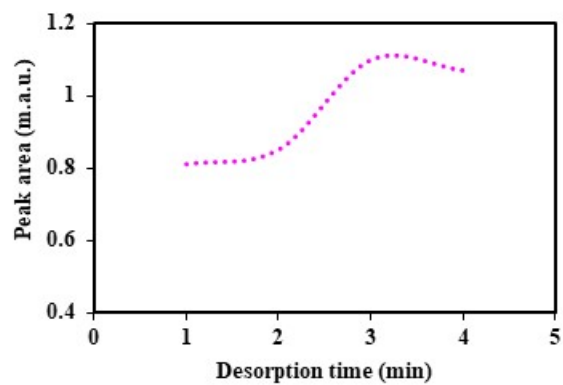

Fig. S4. The effect of desorption time on extraction efficiency.

Extraction conditions: are the same as those used in Fig. S3, except 2.5% (w/v) NaCl was dissolved in the solution.
